# Supplementary material for: A feature selection method for classification within functional genomics experiments based on the proportional overlapping score
Source: Springer Nature journal article supplement (doi:10.1186/1471-2105-15-274), 2014-08-11
Supplement: 12859_2014_6543_MOESM1_ESM.pdf [file 12859_2014_6543_MOESM1_ESM.pdf]

# Additional file 1: RF error rates for different feature selection methods

Additional file 1: Table S1: ‘Breast’ dataset

| N.genes | Wil-RS | mRMR  | MP    | POS   |
|---------|--------|-------|-------|-------|
| 2       | 0.437  | 0.483 | 0.499 | 0.333 |
| 3       | 0.439  | 0.475 | 0.474 | 0.330 |
| 4       | 0.433  | 0.471 | 0.463 | 0.349 |
| 5       | 0.428  | 0.474 | 0.453 | 0.342 |
| 6       | 0.422  | 0.462 | 0.443 | 0.350 |
| 7       | 0.421  | 0.458 | 0.436 | 0.340 |
| 8       | 0.426  | 0.458 | 0.433 | 0.336 |
| 9       | 0.418  | 0.459 | 0.432 | 0.331 |
| 10      | 0.417  | 0.459 | 0.425 | 0.338 |
| 20      | 0.396  | 0.448 | 0.374 | 0.331 |
| 30      | 0.375  | 0.442 | 0.367 | 0.318 |
| 40      | 0.384  | 0.425 | 0.365 | 0.317 |
| 50      | 0.371  | 0.407 | 0.357 | 0.310 |

Additional file 1: Table S2: ‘Srbct’ dataset

| N.genes | Wil-RS | mRMR  | MP    | POS   |
|---------|--------|-------|-------|-------|
| 2       | 0.083  | 0.414 | 0.046 | 0.085 |
| 3       | 0.095  | 0.369 | 0.013 | 0.064 |
| 4       | 0.103  | 0.335 | 0.029 | 0.041 |
| 5       | 0.081  | 0.315 | 0.026 | 0.028 |
| 6       | 0.079  | 0.281 | 0.026 | 0.025 |
| 7       | 0.088  | 0.272 | 0.028 | 0.022 |
| 8       | 0.091  | 0.246 | 0.026 | 0.018 |
| 9       | 0.092  | 0.229 | 0.027 | 0.022 |
| 10      | 0.097  | 0.222 | 0.026 | 0.022 |
| 20      | 0.085  | 0.153 | 0.012 | 0.006 |
| 30      | 0.077  | 0.097 | 0.011 | 0.006 |
| 40      | 0.081  | 0.095 | 0.012 | 0.006 |
| 50      | 0.090  | 0.077 | 0.014 | 0.006 |

Additional file 1: Table S3: ‘Prostate’ dataset

| N.genes | Wil-RS | mRMR  | MP    | POS   |
|---------|--------|-------|-------|-------|
| 2       | 0.435  | 0.415 | 0.117 | 0.117 |
| 3       | 0.481  | 0.390 | 0.098 | 0.083 |
| 4       | 0.470  | 0.366 | 0.097 | 0.088 |
| 5       | 0.452  | 0.345 | 0.092 | 0.086 |
| 6       | 0.433  | 0.324 | 0.089 | 0.091 |
| 7       | 0.432  | 0.313 | 0.087 | 0.088 |
| 8       | 0.433  | 0.294 | 0.090 | 0.092 |
| 9       | 0.445  | 0.274 | 0.088 | 0.092 |
| 10      | 0.440  | 0.265 | 0.085 | 0.088 |
| 20      | 0.218  | 0.192 | 0.070 | 0.071 |
| 30      | 0.215  | 0.157 | 0.071 | 0.068 |
| 40      | 0.216  | 0.158 | 0.071 | 0.065 |
| 50      | 0.200  | 0.140 | 0.069 | 0.062 |

Additional file 1: Table S4: ‘All’ dataset

| N.genes | Wil-RS | mRMR  | MP    | POS   |
|---------|--------|-------|-------|-------|
| 2       | 0.314  | 0.315 | 0.020 | 0.027 |
| 3       | 0.295  | 0.287 | 0.012 | 0.011 |
| 4       | 0.284  | 0.284 | 0.016 | 0.010 |
| 5       | 0.269  | 0.269 | 0.010 | 0.005 |
| 6       | 0.262  | 0.261 | 0.007 | 0.005 |
| 7       | 0.262  | 0.250 | 0.006 | 0.006 |
| 8       | 0.260  | 0.239 | 0.005 | 0.002 |
| 9       | 0.272  | 0.236 | 0.006 | 0.005 |
| 10      | 0.274  | 0.229 | 0.005 | 0.005 |
| 20      | 0.246  | 0.114 | 0.002 | 0.000 |
| 30      | 0.225  | 0.036 | 0.001 | 0.000 |
| 40      | 0.143  | 0.024 | 0.000 | 0.000 |
| 50      | 0.152  | 0.011 | 0.000 | 0.000 |

Additional file 1: Table S5: ‘Lung’ dataset

| N.genes | Wil-RS | mRMR  | MP    | POS   |
|---------|--------|-------|-------|-------|
| 2       | 0.202  | 0.144 | 0.043 | 0.034 |
| 3       | 0.179  | 0.120 | 0.032 | 0.029 |
| 4       | 0.155  | 0.106 | 0.033 | 0.026 |
| 5       | 0.135  | 0.092 | 0.026 | 0.019 |
| 6       | 0.126  | 0.079 | 0.021 | 0.015 |
| 7       | 0.103  | 0.071 | 0.014 | 0.016 |
| 8       | 0.085  | 0.067 | 0.013 | 0.013 |
| 9       | 0.081  | 0.062 | 0.013 | 0.015 |
| 10      | 0.081  | 0.059 | 0.013 | 0.014 |
| 20      | 0.068  | 0.044 | 0.010 | 0.013 |
| 30      | 0.040  | 0.041 | 0.009 | 0.009 |
| 40      | 0.047  | 0.031 | 0.008 | 0.008 |
| 50      | 0.048  | 0.016 | 0.008 | 0.007 |

Additional file 1: Table S6: ‘Carcinoma’ dataset

| N.genes | Wil-RS | mRMR  | MP    | POS   |
|---------|--------|-------|-------|-------|
| 2       | 0.472  | 0.347 | 0.038 | 0.073 |
| 3       | 0.508  | 0.280 | 0.025 | 0.056 |
| 4       | 0.290  | 0.243 | 0.022 | 0.063 |
| 5       | 0.270  | 0.221 | 0.019 | 0.049 |
| 6       | 0.120  | 0.199 | 0.022 | 0.056 |
| 7       | 0.114  | 0.182 | 0.023 | 0.049 |
| 8       | 0.097  | 0.157 | 0.025 | 0.036 |
| 9       | 0.095  | 0.140 | 0.026 | 0.038 |
| 10      | 0.081  | 0.131 | 0.023 | 0.035 |
| 20      | 0.028  | 0.065 | 0.027 | 0.026 |
| 30      | 0.011  | 0.039 | 0.025 | 0.027 |
| 40      | 0.004  | 0.023 | 0.026 | 0.027 |
| 50      | 0.004  | 0.021 | 0.027 | 0.029 |

Additional file 1: Table S7: ‘GSE4045’ dataset

| N.genes | Wil-RS | mRMR  | MP    | POS   |
|---------|--------|-------|-------|-------|
| 2       | 0.201  | 0.266 | 0.208 | 0.186 |
| 3       | 0.195  | 0.245 | 0.180 | 0.152 |
| 4       | 0.193  | 0.236 | 0.194 | 0.156 |
| 5       | 0.178  | 0.223 | 0.172 | 0.126 |
| 6       | 0.182  | 0.228 | 0.169 | 0.129 |
| 7       | 0.177  | 0.218 | 0.160 | 0.130 |
| 8       | 0.176  | 0.213 | 0.155 | 0.136 |
| 9       | 0.172  | 0.217 | 0.151 | 0.132 |
| 10      | 0.172  | 0.211 | 0.147 | 0.132 |
| 20      | 0.143  | 0.193 | 0.141 | 0.125 |
| 30      | 0.140  | 0.197 | 0.149 | 0.122 |
| 40      | 0.141  | 0.192 | 0.152 | 0.121 |
| 50      | 0.143  | 0.192 | 0.154 | 0.134 |

Additional file 1: Table S8: ‘GSE14333’ dataset

| N.genes | Wil-RS | MP    | POS   |
|---------|--------|-------|-------|
| 2       | 0.454  | 0.491 | 0.474 |
| 3       | 0.440  | 0.485 | 0.481 |
| 4       | 0.439  | 0.490 | 0.476 |
| 5       | 0.435  | 0.483 | 0.478 |
| 6       | 0.428  | 0.475 | 0.474 |
| 7       | 0.426  | 0.472 | 0.474 |
| 8       | 0.424  | 0.472 | 0.475 |
| 9       | 0.423  | 0.471 | 0.475 |
| 10      | 0.421  | 0.471 | 0.474 |
| 20      | 0.438  | 0.460 | 0.461 |
| 30      | 0.449  | 0.438 | 0.445 |
| 40      | 0.453  | 0.445 | 0.441 |
| 50      | 0.452  | 0.442 | 0.445 |

Additional file 1: Table S9: ‘GSE27854’ dataset

| N.genes | Wil-RS | MP    | POS   |
|---------|--------|-------|-------|
| 2       | 0.446  | 0.475 | 0.465 |
| 3       | 0.431  | 0.467 | 0.467 |
| 4       | 0.420  | 0.466 | 0.465 |
| 5       | 0.418  | 0.462 | 0.452 |
| 6       | 0.408  | 0.457 | 0.451 |
| 7       | 0.410  | 0.459 | 0.452 |
| 8       | 0.407  | 0.459 | 0.462 |
| 9       | 0.405  | 0.448 | 0.459 |
| 10      | 0.409  | 0.450 | 0.463 |
| 20      | 0.405  | 0.456 | 0.473 |
| 30      | 0.414  | 0.451 | 0.471 |
| 40      | 0.408  | 0.450 | 0.472 |
| 50      | 0.416  | 0.444 | 0.484 |
