# Supplementary material for: A feature selection method for classification within functional genomics experiments based on the proportional overlapping score
Source: Springer Nature journal article supplement (doi:10.1186/1471-2105-15-274), 2014-08-11
Supplement: 12859_2014_6543_MOESM3_ESM.pdf [file 12859_2014_6543_MOESM3_ESM.pdf]

# Additional file 3: SVM error rates for different feature selection methods

Additional file 3: Table S1: ‘Breast’ dataset

| N.genes | Wil-RS | mRMR  | MP    | POS   |
|---------|--------|-------|-------|-------|
| 1       | 0.417  | 0.481 | 0.488 | 0.398 |
| 2       | 0.422  | 0.470 | 0.458 | 0.324 |
| 3       | 0.432  | 0.466 | 0.445 | 0.359 |
| 4       | 0.485  | 0.454 | 0.432 | 0.338 |
| 5       | 0.489  | 0.461 | 0.424 | 0.339 |
| 6       | 0.497  | 0.457 | 0.415 | 0.334 |
| 7       | 0.496  | 0.456 | 0.410 | 0.343 |
| 8       | 0.486  | 0.447 | 0.407 | 0.342 |
| 9       | 0.480  | 0.446 | 0.404 | 0.332 |
| 10      | 0.468  | 0.444 | 0.405 | 0.328 |
| 20      | 0.426  | 0.443 | 0.363 | 0.321 |
| 30      | 0.401  | 0.440 | 0.366 | 0.321 |
| 40      | 0.413  | 0.426 | 0.365 | 0.324 |
| 50      | 0.411  | 0.407 | 0.361 | 0.329 |

Additional file 3: Table S2: ‘Srbct’ dataset

| N.genes | Wil-RS | mRMR  | MP    | POS   |
|---------|--------|-------|-------|-------|
| 1       | 0.421  | 0.454 | 0.068 | 0.134 |
| 2       | 0.176  | 0.419 | 0.041 | 0.099 |
| 3       | 0.174  | 0.397 | 0.014 | 0.060 |
| 4       | 0.152  | 0.361 | 0.017 | 0.029 |
| 5       | 0.143  | 0.343 | 0.012 | 0.018 |
| 6       | 0.149  | 0.311 | 0.011 | 0.006 |
| 7       | 0.150  | 0.303 | 0.015 | 0.003 |
| 8       | 0.165  | 0.286 | 0.015 | 0.003 |
| 9       | 0.184  | 0.268 | 0.016 | 0.004 |
| 10      | 0.180  | 0.266 | 0.017 | 0.004 |
| 20      | 0.177  | 0.213 | 0.011 | 0.018 |
| 30      | 0.152  | 0.161 | 0.023 | 0.022 |
| 40      | 0.162  | 0.147 | 0.025 | 0.019 |
| 50      | 0.131  | 0.126 | 0.029 | 0.018 |

Additional file 3: Table S3: ‘Lung’ dataset

| N.genes | Wil-RS | mRMR  | MP    | POS   |
|---------|--------|-------|-------|-------|
| 1       | 0.173  | 0.153 | 0.065 | 0.040 |
| 2       | 0.175  | 0.133 | 0.054 | 0.040 |
| 3       | 0.155  | 0.122 | 0.048 | 0.032 |
| 4       | 0.144  | 0.110 | 0.041 | 0.025 |
| 5       | 0.136  | 0.100 | 0.034 | 0.020 |
| 6       | 0.133  | 0.090 | 0.030 | 0.020 |
| 7       | 0.116  | 0.084 | 0.027 | 0.018 |
| 8       | 0.103  | 0.080 | 0.026 | 0.018 |
| 9       | 0.102  | 0.074 | 0.026 | 0.017 |
| 10      | 0.103  | 0.072 | 0.024 | 0.018 |
| 20      | 0.081  | 0.049 | 0.022 | 0.015 |
| 30      | 0.073  | 0.050 | 0.022 | 0.013 |
| 40      | 0.080  | 0.043 | 0.023 | 0.012 |
| 50      | 0.066  | 0.026 | 0.024 | 0.011 |

Additional file 3: Table S4: ‘GSE4045’ dataset

| N.genes | Wil-RS | mRMR  | MP    | POS   |
|---------|--------|-------|-------|-------|
| 1       | 0.201  | 0.330 | 0.221 | 0.249 |
| 2       | 0.201  | 0.266 | 0.186 | 0.186 |
| 3       | 0.195  | 0.245 | 0.166 | 0.152 |
| 4       | 0.193  | 0.236 | 0.153 | 0.156 |
| 5       | 0.178  | 0.223 | 0.149 | 0.126 |
| 6       | 0.182  | 0.228 | 0.154 | 0.129 |
| 7       | 0.177  | 0.218 | 0.143 | 0.130 |
| 8       | 0.176  | 0.213 | 0.143 | 0.136 |
| 9       | 0.172  | 0.217 | 0.139 | 0.132 |
| 10      | 0.172  | 0.211 | 0.134 | 0.132 |
| 20      | 0.143  | 0.193 | 0.114 | 0.125 |
| 30      | 0.140  | 0.197 | 0.106 | 0.122 |
| 40      | 0.141  | 0.192 | 0.098 | 0.121 |
| 50      | 0.143  | 0.192 | 0.098 | 0.134 |

Additional file 3: Table S5: 'GSE14333'  
dataset

| N.genes | Wil-RS | MP    | POS   |
|---------|--------|-------|-------|
| 1       | 0.447  | 0.412 | 0.431 |
| 2       | 0.453  | 0.447 | 0.455 |
| 3       | 0.440  | 0.463 | 0.461 |
| 4       | 0.437  | 0.465 | 0.464 |
| 5       | 0.431  | 0.465 | 0.471 |
| 6       | 0.429  | 0.461 | 0.471 |
| 7       | 0.430  | 0.454 | 0.475 |
| 8       | 0.427  | 0.452 | 0.474 |
| 9       | 0.427  | 0.451 | 0.475 |
| 10      | 0.431  | 0.454 | 0.470 |
| 20      | 0.460  | 0.440 | 0.472 |
| 30      | 0.468  | 0.432 | 0.460 |
| 40      | 0.472  | 0.423 | 0.463 |
| 50      | 0.468  | 0.423 | 0.462 |

Additional file 3: Table S6: 'GSE27854'  
dataset

| N.genes | Wil-RS | MP    | POS   |
|---------|--------|-------|-------|
| 1       | 0.435  | 0.465 | 0.494 |
| 2       | 0.458  | 0.483 | 0.480 |
| 3       | 0.447  | 0.479 | 0.470 |
| 4       | 0.443  | 0.477 | 0.479 |
| 5       | 0.445  | 0.485 | 0.466 |
| 6       | 0.440  | 0.476 | 0.470 |
| 7       | 0.443  | 0.477 | 0.459 |
| 8       | 0.443  | 0.483 | 0.456 |
| 9       | 0.438  | 0.477 | 0.459 |
| 10      | 0.445  | 0.475 | 0.464 |
| 20      | 0.436  | 0.477 | 0.468 |
| 30      | 0.440  | 0.482 | 0.466 |
| 40      | 0.434  | 0.475 | 0.472 |
| 50      | 0.439  | 0.472 | 0.475 |
