# Supplementary material for: A feature selection method for classification within functional genomics experiments based on the proportional overlapping score
Source: Springer Nature journal article supplement (doi:10.1186/1471-2105-15-274), 2014-08-11
Supplement: 12859_2014_6543_MOESM5_ESM.pdf [file 12859_2014_6543_MOESM5_ESM.pdf]

$$M_i = 1,1,1,1,0,1,1,1,1,1,1,0,1, \quad 0,0,0,0,0,0,0,0,0,0,0,0,0,0,0,0,0,0, \quad 1,0,1,1$$

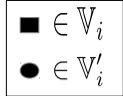

class

2

outliers

$a_{i,2}$

$b_{i,2}$

0

0

0

0

0

0

0

0

0

0

0

0

0

0

0

0

0

1

1

1

Overlapping Region

outlier

0

1

1

1

1

1

1

1

1

1

1

1

1

1

1

1

1

1

1

1

1

1

1

1

1

1

1

1

1

1

1

1

0

0

0

0

0

0

0

$a_{i,1}$

$b_{i,1}$

gene  $i$  expression values
