# Supplementary material for: A feature selection method for classification within functional genomics experiments based on the proportional overlapping score
Source: Springer Nature journal article supplement (doi:10.1186/1471-2105-15-274), 2014-08-11

# Srbct

RF

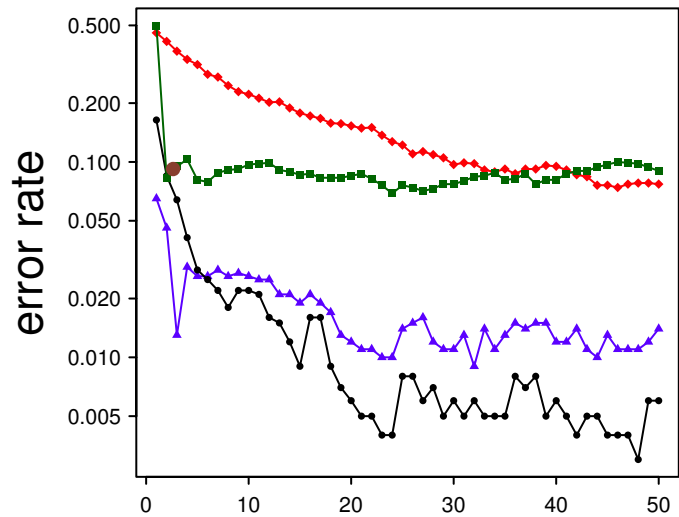

KNN

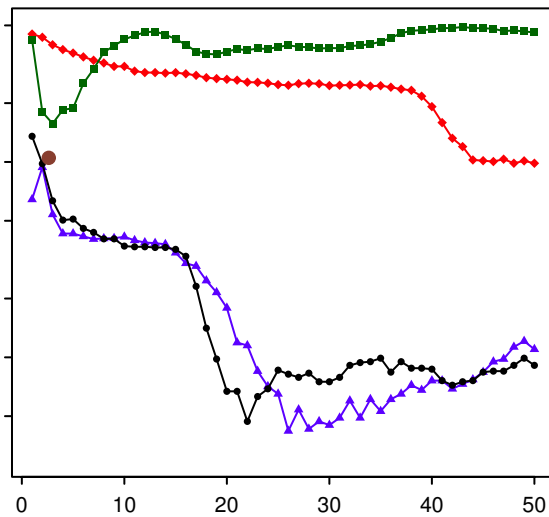

SVM

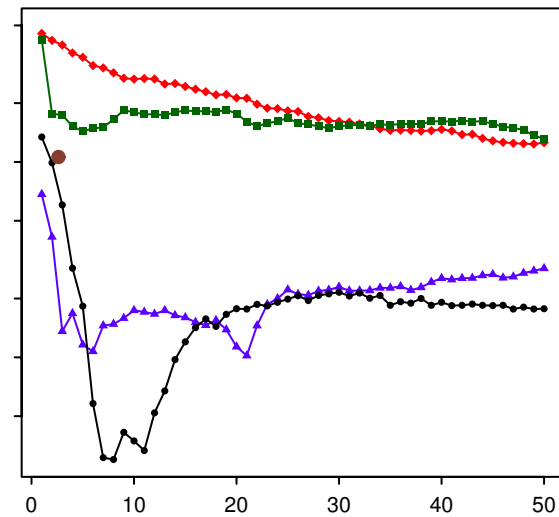

# Breast

RF

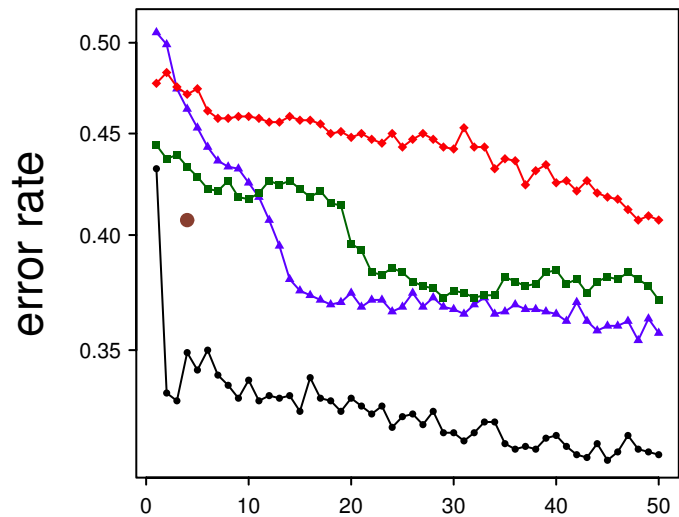

KNN

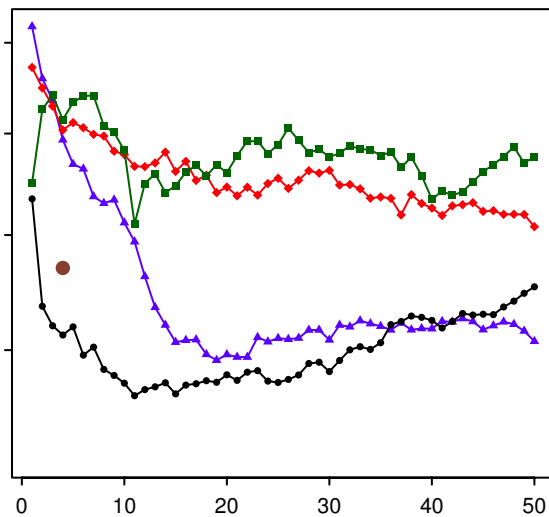

SVM

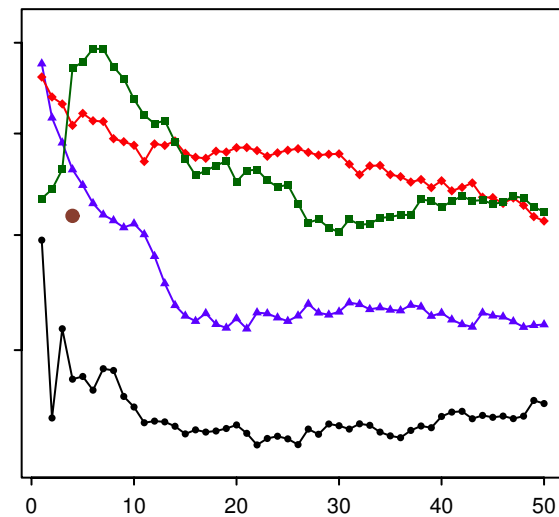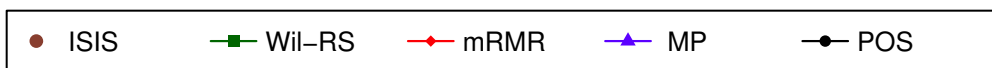

Supplement: 12859_2014_6543_MOESM7_ESM.pdf [file 12859_2014_6543_MOESM7_ESM.pdf]
